# Supplementary material
Source: PubMed Central journal article supplement (PMC7433757)
Supplement: MD-011-C9MD00447E-s001.pdf [file MD-011-C9MD00447E-s001.pdf]

## Small molecule inhibitors in pancreatic cancer

Jufeng Sun,<sup>a,b</sup> Cecilia Russell,<sup>a</sup> Christopher J. Scarlett<sup>c</sup> and Adam McCluskey<sup>a\*</sup>

Electronic Supporting Information

Contents

Table S1      Origin of compound, natural or synthetic

**Table S1.** Origin of compounds, natural versus synthetic, evaluated in clinical trials against pancreatic cancer

| <b>Compounds</b>        | <b>Origin</b> | <b>Compounds</b>                                                                                                           | <b>Origin</b> |
|-------------------------|---------------|----------------------------------------------------------------------------------------------------------------------------|---------------|
| Gemcitabine (1)         | synthetic     | PD173074 (42)                                                                                                              | synthetic     |
| 5-FU (2)                | natural       | PKC412 (43)                                                                                                                | synthetic     |
| Nab-paclitaxel (3)      | semisynthetic | BGB324 (44)                                                                                                                | synthetic     |
| leucovorin (4)          | synthetic     | GSK2256098 (45)                                                                                                            | synthetic     |
| irinotecan (5)          | semisynthetic | PF573228 (46)                                                                                                              | synthetic     |
| oxaliplatin (6)         | synthetic     | Binimetinib (MEK162) (47)                                                                                                  | synthetic     |
| PF-562271 (7)           | synthetic     | Cobimetinib (48)                                                                                                           | synthetic     |
| LB-100 (8)              | synthetic     | GSK2656157 (49)                                                                                                            | synthetic     |
| C4 (9)                  | synthetic     | 3-(2,5-dimethoxyphenyl)-N-((4-(5-(4-fluorophenyl)-2-(methylthio)-1H-imidazol-4-yl)pyridin-2-yl)carbamoyl)-propanamide (50) | synthetic     |
| CI-1040 (10)            | synthetic     | SCH727965 (dinaciclib) (51)                                                                                                | synthetic     |
| Marizomib (11)          | synthetic     | AZD6738 (52)                                                                                                               | synthetic     |
| Salirasib (12)          | synthetic     | L61H46 (53)                                                                                                                | synthetic     |
| Vorinostat (13)         | synthetic     | PG-53-001 (54)                                                                                                             | synthetic     |
| Pimasertib (14)         | synthetic     | HJC0416 (55)                                                                                                               | synthetic     |
| AZD1775 (15)            | synthetic     | XZH-5 (56)                                                                                                                 | synthetic     |
| Saridegib (16)          | synthetic     | methyl N $\alpha$ -(((3,5-bis(trifluoromethyl)phenyl)-carbamoyl)isoleucyl)-N $\tau$ -methyl-L-histidinate (57)             | synthetic     |
| capecitabine (17)       | synthetic     | Cryptotanshinone (58)                                                                                                      | natural       |
| Pazopanib (18)          | synthetic     | JQ1 (59)                                                                                                                   | synthetic     |
| Vatalanib (19)          | synthetic     | I-BET 762 (60)                                                                                                             | synthetic     |
| Galunisertib (20)       | synthetic     | ST-3595 (61)                                                                                                               | synthetic     |
| Hydroxychloroquine (21) | synthetic     | CG200745 (62)                                                                                                              | synthetic     |
| Lapatinib (22)          | synthetic     | MGCD0103 (63)                                                                                                              | synthetic     |
| Vandetanib (23)         | synthetic     | Belinostat (64)                                                                                                            | synthetic     |
| Sorafenib (24)          | synthetic     | Panobinostat (65)                                                                                                          | synthetic     |
| erlotinib (25)          | synthetic     | UMI-77 (66)                                                                                                                | synthetic     |
| Dasatinib (26)          | synthetic     | 4-((6-nitroquinolin-4-yl)amino)-N-(4-(pyridin-4-ylamino)phenyl benzamide (67)                                              | synthetic     |
| Saracatinib (27)        | synthetic     | 2,3,4,6-tetrahydroxy-5H-benzo[7]annulen-5-one (68)                                                                         | synthetic     |
| Imatinib (28)           | synthetic     | TW-37 (69)                                                                                                                 | synthetic     |
| Vismodegib (29)         | synthetic     | ABT737 (70)                                                                                                                | synthetic     |
| Dactolisib (30)         | synthetic     | BMS-754807 (71)                                                                                                            | synthetic     |
| Everolimus (31)         | synthetic     | P1608K04 (72)                                                                                                              | synthetic     |
| PX-12 (32)              | synthetic     | MI-319 (73)                                                                                                                | synthetic     |
| Veliparib (33)          | synthetic     | NPC-26 (74)                                                                                                                | synthetic     |
| Trametinib (34)         | synthetic     | Spongiatriol (75)                                                                                                          | natural       |
| Selumetinib (35)        | synthetic     | SW IV-134 (76)                                                                                                             | synthetic     |
| Rigosertib (36)         | synthetic     | BAY ACC002 (77)                                                                                                            | synthetic     |
| Olaparib (37)           | synthetic     | ICG-001 (78)                                                                                                               | synthetic     |
| Axitinib (38)           | synthetic     | IPI-269609 (79)                                                                                                            | synthetic     |
| cisplatin (39)          | synthetic     | MRK-003 (80)                                                                                                               | synthetic     |
| Mitomycin C (40)        | natural       | MDC-1016 (81)                                                                                                              | synthetic     |
| Sunitinib (41)          | synthetic     | TIC10/ONC201 (82)                                                                                                          | synthetic     |

| <b>Table S2.</b> Compound, pancreatic cancer IC <sub>50</sub> and protein target(s) |                                                                                                                                    |                                                                                |
|-------------------------------------------------------------------------------------|------------------------------------------------------------------------------------------------------------------------------------|--------------------------------------------------------------------------------|
| <b>Compound</b>                                                                     | <b>IC<sub>50</sub> (μM)</b>                                                                                                        | <b>Target</b>                                                                  |
| Gemcitabine (1)                                                                     | 0.0035-0.524 (AsPC-1, BxPC-3, Capan-1, Capan-2, CFPAC1,H48N, Hs766T, KP-1N, KP-2, KP-3, MIA PaCa-2, NOR-P1, Panc1, SUIT-2, SW1990) | Thymidylate synthase and dihydrofolate reductase                               |
| 5-FU (2)                                                                            | 0.93-6.29 (AsPC-1, BxPC-3, Capan-1, Capan-2, CFPAC1,H48N, Hs766T, KP-1N, KP-2, KP-3, MIA PaCa-2, NOR-P1, Panc1, SUIT-2, SW1990)    | Thymidylate synthase                                                           |
| Nab-paclitaxel (3)                                                                  | 0.243-4.9 (AsPC-1, BxPC-3, MiaPaCa-2 and Panc-1)                                                                                   | Microtubulin                                                                   |
| leucovorin (4)                                                                      | NA*                                                                                                                                | No target                                                                      |
| irinotecan (5)                                                                      | 0.426, 0.491, 0.68, 0.26 (pa01c, pa02c, MiaPaCa-2, Panc-1)                                                                         | Topoisomerase I                                                                |
| oxaliplatin (6)                                                                     | < 0.025 ( COLO-357, MiaPaCa-2)                                                                                                     | Deoxyribonucleic Acid (DNA)                                                    |
| PF-562271 (7)                                                                       | NA*                                                                                                                                | Focal adhesion kinase and pyruvate kinase 2                                    |
| LB-100 (8)                                                                          | 3.98, 0.85 (panc-1, BxPC-3)                                                                                                        | Protein phosphatase 2A                                                         |
| C4 (9)                                                                              | NA*                                                                                                                                | Focal adhesion kinase                                                          |
| CI-1040 (10)                                                                        | NA*                                                                                                                                | Mitogen-activated protein kinase                                               |
| Marizomib (11)                                                                      | NA*                                                                                                                                | Proteasome                                                                     |
| Salirasib (12)                                                                      | NA*                                                                                                                                | RAS signalling pathway                                                         |
| Vorinostat (13)                                                                     | 1.6 (MiaPaCa-2)                                                                                                                    | Histone deacetylase (HDAC)                                                     |
| Pimasertib (14)                                                                     | NA*                                                                                                                                | Mitogen-activated protein kinase 1/2                                           |
| AZD1775 (15)                                                                        | 0.5-2.1 (AsPC-1, Capan-1, Capan-2, MIA PaCa-2, PANC-1, SNU213, SNU324, and SNU410)                                                 | Wee1 kinase                                                                    |
| Saridegib (16)                                                                      | NA*                                                                                                                                | Hedgehog signalling pathway                                                    |
| capecitabine (17)                                                                   | NA*                                                                                                                                | Deoxyribonucleic Acid (DNA)                                                    |
| Pazopanib (18)                                                                      | NA*                                                                                                                                | VEGF tyrosine kinase receptors 1, 2, and 3                                     |
| Vatalanib (19)                                                                      | NA*                                                                                                                                | Polytyrosine kinase                                                            |
| Galunisertib (20)                                                                   | NA*                                                                                                                                | Amtransforming growth factor-beta receptor serine/threonine kinase             |
| Hydroxychloroquine (21)                                                             | 33 (BxPC-3)                                                                                                                        | Autophagy                                                                      |
| Lapatinib (22)                                                                      | < 2 μM (BxPc-3,HPAC)                                                                                                               | HER2/neu and EGF receptor tyrosine kinase                                      |
| Vandetanib (23)                                                                     | 18 (ASPC-1)                                                                                                                        | VEGFR2, RET, and EGFR tyrosine kinase                                          |
| Sorafenib (24)                                                                      | 6.07 (HEK293T with KARS mutation)                                                                                                  | VEGF receptor tyrosine kinase                                                  |
| erlotinib (25)                                                                      | 1.6 (ASPC-1)                                                                                                                       | EGFR Tyrosine kinase                                                           |
| Dasatinib (26)                                                                      | 0.02-0.25 (HPAC1, Panc0403, Panc0504, Panc1005, Panc0813, CaPan2)                                                                  | SRC (a non-receptor tyrosine kinase protein) and ABL receptor tyrosine kinases |
| Saracatinib (27)                                                                    | NA*                                                                                                                                | SRC receptor tyrosine kinases                                                  |
| Imatinib (28)                                                                       | 15, 17, 19, 30 (BxPC-3, HPAC, MiaPaCa-2, and Panc-1)                                                                               | PDGFRs tyrosine kinase                                                         |
| Vismodegib (29)                                                                     | 6.3 (MiaPaCa-2)                                                                                                                    | Hedgehog signalling pathway                                                    |
| Dactolisib (30)                                                                     | NA*                                                                                                                                | Phosphatidylinositol 3-kinase and the mammalian target of rapamycin            |
| Everolimus (31)                                                                     | NA*                                                                                                                                | Mammalian target of rapamycin                                                  |
| PX-12 (32)                                                                          | NA*                                                                                                                                | Proto-oncogene thioredoxin                                                     |
| Veliparib (33)                                                                      | 12 (MiaPaCa-2) <sup>16</sup>                                                                                                       | Poly (ADP ribose) polymerase                                                   |
| Trametinib (34)                                                                     | 0.0384, >5 (BxPC-3, panc-1)                                                                                                        | Mitogen-activated protein kinase                                               |
| Selumetinib (35)                                                                    | NA*                                                                                                                                | Mitogen-activated protein kinase 1/2                                           |
| Rigosertib (36)                                                                     | NA*                                                                                                                                | Polo-like kinase 1 and phosphoinositide 3-kinase                               |
| Olaparib (37)                                                                       | 9 (MiaPaCa-2)                                                                                                                      | Poly (ADP ribose) polymerase                                                   |
| Axitinib (38)                                                                       | NA*                                                                                                                                | Receptor tyrosine kinase of VEGFR                                              |
| cisplatin (39)                                                                      | 0.215, 0.507, 0.186,0.952 (Pa01c, pa02c, pa03c, pa04c)                                                                             | Deoxyribonucleic Acid (DNA)                                                    |
| Mitomycin C (40)                                                                    | 0.00476, 0.054, 0.00474,0.00634 (Pa01c, pa02c, pa03c, pa04c) <sup>3</sup>                                                          | Deoxyribonucleic Acid (DNA)                                                    |
| Sunitinib (41)                                                                      | NA*                                                                                                                                | VEGFR and PDGFR tyrosine kinase                                                |

|                                                                                                                            |                                                                                                                                    |                                                                                                                                                              |
|----------------------------------------------------------------------------------------------------------------------------|------------------------------------------------------------------------------------------------------------------------------------|--------------------------------------------------------------------------------------------------------------------------------------------------------------|
| PD173074 (42)                                                                                                              | 2.5 to 15 (AsPC-1, Capan-1, HPAF-II, MiaPaCa-2, and Panc 1)                                                                        | FGFR1 tyrosine kinase; VEGFR2                                                                                                                                |
| PKC412 (43)                                                                                                                | 0.25 to 20 (16 pancreatic cancer cell lines)                                                                                       | Ser/Thr and tyrosine kinases, including fms-like tyrosine kinases, protein kinase C, VEGFR2, tyrosine-protein kinase Kit, PDGFR $\alpha$ , and PDGFR $\beta$ |
| BGB324 (44) + gemcitabine (1)                                                                                              | 0.016, 0.0069 (AsPC-1, MiaPaCa-2)                                                                                                  | Receptor tyrosine kinase Axl                                                                                                                                 |
| GSK2256098 (45)                                                                                                            | 25, 29 (L3.6P1, Panc-1)                                                                                                            | Focal adhesion kinase                                                                                                                                        |
| PF573228 (46)                                                                                                              | NA*                                                                                                                                | Focal adhesion kinase                                                                                                                                        |
| Binimetinib (MEK162) (47)                                                                                                  | 0.092, 0.28 and 0.316 (MiaPaCa-2, AsPC-1, and CAPAN-2)                                                                             | Mitogen-activated protein kinase kinase                                                                                                                      |
| Cobimetinib (48)                                                                                                           | NA                                                                                                                                 | Mitogen-activated protein kinase kinase                                                                                                                      |
| GSK2656157 (49)                                                                                                            | NA*                                                                                                                                | Protein kinase R (PKR)-like endoplasmic reticulum kinase                                                                                                     |
| 3-(2,5-dimethoxyphenyl)-N-((4-(5-(4-fluorophenyl)-2-(methylthio)-1H-imidazol-4-yl)pyridin-2-yl)carbamoyl)-propanamide (50) | EC <sub>50</sub> : 3.5, 1.5 (Colo357, Panc89)                                                                                      | Protein kinase CK1 $\delta$                                                                                                                                  |
| SCH727965 (dinaciclib) (51)                                                                                                | GI <sub>50</sub> : 0.01, 0.02 (MiaPaCa-2, Pa20C)                                                                                   | Cyclin-dependent kinase (CDK) inhibitor for CDK2, CDK5, CDK1 and CDK9                                                                                        |
| AZD6738 (52)                                                                                                               | GR <sub>50</sub> : 0.9 $\mu$ M, 1.57, 1.98, 3.2, 4.8, 9.8, 32.3 (SW1990, Capan-1, AsPC-1, HPAF-II, Capan-2, MiaPaCa-2, and Panc-1) | Ataxia telangiectasia and Rad3-related protein                                                                                                               |
| L61H46 (53)                                                                                                                | 0.86, 2.83 (BxPC-3, Panc-1)                                                                                                        | Signal transducer and activator of transcription3                                                                                                            |
| PG-S3-001 (54)                                                                                                             | ED <sub>50</sub> : 2.4 (Panc10.05)                                                                                                 | Signal transducer and activator of transcription3                                                                                                            |
| HJC0416 (55)                                                                                                               | 0.04, 1.88 (AsPC-1, Panc-1)                                                                                                        | Signal transducer and activator of transcription3                                                                                                            |
| XZH-5 (56)                                                                                                                 | 24.7, 17.4 and 17.9 (Panc-1, HPAC, and SW1990)                                                                                     | Signal transducer and activator of transcription3                                                                                                            |
| methyl N $\alpha$ -(((3,5-bis(trifluoromethyl)phenyl)-carbamoyl)isoleucyl)-N $\tau$ -methyl-L-histidinate (57)             | 10.1, 7.6, 8.3 (Panc-1, HPAC, and SW1990)                                                                                          | Signal transducer and activator of transcription3                                                                                                            |
| Cryptotanshinone (58)                                                                                                      | NA*                                                                                                                                | Signal transducer and activator of transcription3                                                                                                            |
| JQ1 (59)                                                                                                                   | 0.037, 0.72 and 0.19 (AsPC-1, Panc-1, and CAPAN-1)                                                                                 | Bromodomain and extra terminal proteins: BRD2, BRD3 and BRD4                                                                                                 |
| I-BET 762 (60)                                                                                                             | 0.231, 2.55 and 0.99 (AsPC-1, Panc-1, and CAPAN-1)                                                                                 | Bromodomain and extra terminal proteins: BRD2, BRD3 and BRD4                                                                                                 |
| BMS-754807 (71) + gemcitabine (1)                                                                                          | 0.075, 0.070, 0.016, 0.016 (AsPC, Panc-1, MiaPaCa-2, and BxPC-3)                                                                   | IGF-1R and insulin receptor (IR) family kinases                                                                                                              |
| P1608K04 (72)                                                                                                              | 8.5, 14, and 20 (Panc-1, MiaPaCa-2, and AsPC1)                                                                                     | Protein arginine methyltransferases                                                                                                                          |
| MI-319 (73)                                                                                                                | NA*                                                                                                                                | Murine double minute 2 protein                                                                                                                               |
| NPC-26 (74)                                                                                                                | NA*                                                                                                                                | Mitochondrion interfering                                                                                                                                    |
| Songiatriol (75)                                                                                                           | 13, 8, 6 and 13 (AsPC-1, BxPC-3, MiaPaCa-2 and Panc-1)                                                                             | Nuclear factor kappa B                                                                                                                                       |
| UMI-77 (66)                                                                                                                | 3.4, 4.4 and 5.5 (AsPC-1, BxPC-3, and Capan-2)                                                                                     | Bcl-2 family proteins                                                                                                                                        |
| 4-((6-nitroquinolin-4-yl)amino)-N-(4-(pyridin-4-ylamino) phenyl benzamide (67)                                             | 15.1 (BxPC-3)                                                                                                                      | Bcl-2 family proteins                                                                                                                                        |
| 2,3,4,6-tetrahydroxy-5H-benzo[7]annulen-5-one (68)                                                                         | 17.6 (MiaPaCa-2)                                                                                                                   | Bcl-2 family proteins                                                                                                                                        |
| TW-37 (69)                                                                                                                 | NA*                                                                                                                                | Bcl-2 family proteins                                                                                                                                        |
| ABT737 (70)                                                                                                                | NA*                                                                                                                                | Bcl-2 family proteins                                                                                                                                        |
| ST-3595 (61)                                                                                                               | NA*                                                                                                                                | Histone deacetylases                                                                                                                                         |
| CG200745 (62)                                                                                                              | 2.4, 10.7 and 7.4 (BxPC3, CFPAC1 and HPAC)                                                                                         | Histone deacetylases                                                                                                                                         |
| MGCD0103 (63)                                                                                                              | 3.9, 1.1, 0.6 and 1.8 (AsPC-1, BxPC-3, MiaPaca-2, and Panc-1)                                                                      | Histone deacetylases                                                                                                                                         |
| Belinostat (64)                                                                                                            | EC <sub>50</sub> : 0.3, 0.7, 0.5, 1.1, 1.1 and 0.7                                                                                 | Histone deacetylases                                                                                                                                         |

|                            |                                                                                              |                                                                |
|----------------------------|----------------------------------------------------------------------------------------------|----------------------------------------------------------------|
|                            | (AsPC1, BxPC3, Panc0327, Panc0403, and Panc1005, MiaPaCa-2)                                  |                                                                |
| Panobinostat ( <b>65</b> ) | 0.284, 0.00046, 0.0077, 0.261, 0.013<br>(BxPC3, Panc0327, Panc0403, Panc1005, and MiaPaCa-2) | Histone deacetylases                                           |
| SW IV-134 ( <b>76</b> )    | 7.4, 6.8, 6.3 and 7.8 (CFPAC-1, BxPC-3, AsPC-1, Panc-1 and MiaPaCa-2)                        | Sigma-2 receptor                                               |
| BAY ACC002 ( <b>77</b> )   | NA*                                                                                          | Acetyl-CoA carboxylase 1 and 2;<br>Hedgehog signalling pathway |
| ICG-001 ( <b>78</b> )      | 5.48, 14.07, 3.43 and 3.31 (AsPC-1, L3.6pl, Panc-1 and MiaPaCa-2)                            | CREB-binding protein                                           |
| IPI-269609 ( <b>79</b> )   | NA*                                                                                          | Hedgehog signalling pathway                                    |
| MRK-003 ( <b>80</b> )      | NA*                                                                                          | Gamma secretase                                                |
| MDC-1016 ( <b>81</b> )     | NA*                                                                                          | RAS inhibitor                                                  |
| TIC10/ONC201 ( <b>82</b> ) | NA*                                                                                          | Tumour necrosis (TNF)-related<br>apoptosis-inducing ligand     |

\*NA: The IC<sub>50</sub> value is not available in the related literature.
